# Supplementary material
Source: publisher figshare collection journal article supplement (https://geolsoc.figshare.com/ndownloader/files/30667989)
Supplement: Supplementary file 1 [file 30667989]

|  |  |  |  |  |  |  |  |  |  |  |  |  |  |  |  |  |  |  |  |  |
| --- | --- | --- | --- | --- | --- | --- | --- | --- | --- | --- | --- | --- | --- | --- | --- | --- | --- | --- | --- | --- |
| Labels | 206Pbc(1) | U | Th | Th/U | 238U/206Pb* (1) | | | 207Pb*/206Pb* (1) | | | 238U/206Pb* age (1) | | | 238U/206Pb* age (2) | | | 207Pb*/206Pb* age (1) | | | Disc (3) |
|  | (%) | (ppm) | (ppm) |  |  | | |  | | | (Ma) | | | (Ma) | | | (Ma) | | | (%) |
| D5_001 | 1.39 | 739 | 260 | 0.36 | 6.96 | ± | 0.08 | 0.1006 | ± | 0.0013 | 865.4 | ± | 9.8 | 833.8 | ± | 9.5 | 1636 | ± | 24 | 47.10 |
| D5_002 | 0.00 | 472 | 474 | 1.03 | 3.99 | ± | 0.05 | 0.0994 | ± | 0.0010 | 1441.0 | ± | 17.0 | 1427.9 | ± | 16.9 | 1615 | ± | 18 | 10.77 |
| D5_003 | 0.00 | 390 | 268 | 0.70 | 13.40 | ± | 0.15 | 0.0583 | ± | 0.0011 | 463.9 | ± | 5.0 | 462.8 | ± | 5.0 | 542 | ± | 42 | 14.41 |
| D5_004 | 0.08 | 270 | 126 | 0.48 | 3.28 | ± | 0.03 | 0.1132 | ± | 0.0015 | 1714.8 | ± | 14.9 | 1700.8 | ± | 14.9 | 1852 | ± | 24 | 7.41 |
| D5_005 | 0.12 | 883 | 148 | 0.17 | 2.77 | ± | 0.03 | 0.1280 | ± | 0.0010 | 1987.5 | ± | 19.2 | 1976.4 | ± | 19.2 | 2071 | ± | 15 | 4.03 |
| D5_006 | 0.04 | 751 | 65 | 0.09 | 7.57 | ± | 0.09 | 0.0689 | ± | 0.0009 | 799.6 | ± | 8.8 | 796.8 | ± | 8.8 | 897 | ± | 27 | 10.85 |
| D5_007 | 1.63 | 610 | 163 | 0.27 | 7.26 | ± | 0.08 | 0.0987 | ± | 0.0015 | 832.0 | ± | 8.2 | 802.3 | ± | 8.0 | 1601 | ± | 29 | 48.03 |
| D5_008 | 0.33 | 114 | 64 | 0.58 | 3.10 | ± | 0.04 | 0.1123 | ± | 0.0021 | 1804.4 | ± | 20.4 | 1801.4 | ± | 20.4 | 1837 | ± | 34 | 1.78 |
| D5_009 | 0.35 | 194 | 47 | 0.25 | 6.87 | ± | 0.10 | 0.0654 | ± | 0.0018 | 875.6 | ± | 11.7 | 878.5 | ± | 11.7 | 787 | ± | 57 | -11.25 |
| D5_010 | 1.38 | 568 | 1405 | 2.54 | 7.90 | ± | 0.10 | 0.0554 | ± | 0.0048 | 768.3 | ± | 9.2 | 776.8 | ± | 8.5 | 429 | ± | 182 | -79.09 |
| D5_011 | 0.03 | 200 | 191 | 0.98 | 6.08 | ± | 0.08 | 0.0694 | ± | 0.0028 | 982.0 | ± | 11.5 | 982.2 | ± | 11.2 | 910 | ± | 81 | -7.91 |
| D5_012 | 0.18 | 743 | 166 | 0.23 | 3.62 | ± | 0.05 | 0.1120 | ± | 0.0011 | 1574.0 | ± | 17.4 | 1550.5 | ± | 17.2 | 1833 | ± | 18 | 14.13 |
| D5_013 | 0.12 | 241 | 124 | 0.53 | 6.17 | ± | 0.07 | 0.0731 | ± | 0.0021 | 967.7 | ± | 9.9 | 965.8 | ± | 9.9 | 1018 | ± | 56 | 4.94 |
| D5_014 | 0.36 | 162 | 268 | 1.70 | 11.07 | ± | 0.18 | 0.0557 | ± | 0.0063 | 557.4 | ± | 8.8 | 559.4 | ± | 8.0 | 443 | ± | 235 | -25.83 |
| D5_015 | 0.00 | 379 | 190 | 0.51 | 10.58 | ± | 0.15 | 0.0595 | ± | 0.0011 | 582.1 | ± | 7.9 | 582.0 | ± | 7.9 | 585 | ± | 38 | 0.50 |
| D5_016 | 0.19 | 504 | 208 | 0.42 | 13.49 | ± | 0.15 | 0.0549 | ± | 0.0017 | 460.9 | ± | 5.0 | 461.6 | ± | 5.0 | 410 | ± | 68 | -12.41 |
| D5_017 | 0.00 | 190 | 56 | 0.30 | 2.85 | ± | 0.03 | 0.1161 | ± | 0.0015 | 1937.5 | ± | 16.5 | 1937.5 | ± | 16.5 | 1898 | ± | 24 | -2.08 |
| D5_018 | 0.59 | 669 | 80 | 0.12 | 149.59 | ± | 2.72 | 0.0488 | ± | 0.0039 | 43.0 | ± | 0.8 | 42.8 | ± | 0.8 | 141 | ± | 176 | 69.54 |
| D5_019 | 0.27 | 134 | 78 | 0.60 | 2.20 | ± | 0.03 | 0.1616 | ± | 0.0023 | 2411.7 | ± | 27.0 | 2400.0 | ± | 27.0 | 2474 | ± | 24 | 2.52 |
| D5_020 | 0.15 | 385 | 151 | 0.40 | 13.54 | ± | 0.18 | 0.0567 | ± | 0.0022 | 459.3 | ± | 5.8 | 458.9 | ± | 5.7 | 482 | ± | 82 | 4.72 |
| D5_021 | 0.00 | 329 | 89 | 0.28 | 13.19 | ± | 0.15 | 0.0568 | ± | 0.0012 | 471.2 | ± | 5.2 | 471.0 | ± | 5.3 | 486 | ± | 44 | 3.04 |
| D5_022 | 0.00 | 191 | 105 | 0.57 | 2.95 | ± | 0.04 | 0.1140 | ± | 0.0013 | 1883.6 | ± | 19.9 | 1883.6 | ± | 19.9 | 1865 | ± | 20 | -1.00 |
| D5_023 | 0.21 | 510 | 235 | 0.47 | 3.10 | ± | 0.04 | 0.1133 | ± | 0.0015 | 1801.6 | ± | 18.4 | 1796.3 | ± | 18.4 | 1854 | ± | 23 | 2.82 |
| D5_024 | 0.00 | 200 | 187 | 0.96 | 2.39 | ± | 0.03 | 0.1514 | ± | 0.0015 | 2256.7 | ± | 25.6 | 2237.4 | ± | 25.6 | 2363 | ± | 16 | 4.50 |
| D5_025 | 0.00 | 343 | 34 | 0.10 | 3.27 | ± | 0.04 | 0.1126 | ± | 0.0014 | 1717.9 | ± | 19.6 | 1705.0 | ± | 19.6 | 1843 | ± | 22 | 6.79 |
| D5_026 | 0.54 | 981 | 251 | 0.26 | 5.49 | ± | 0.05 | 0.0878 | ± | 0.0011 | 1079.2 | ± | 9.8 | 1064.8 | ± | 9.7 | 1378 | ± | 24 | 21.68 |
| D5_027 | 2.18 | 262 | 69 | 0.27 | 11.41 | ± | 0.15 | 0.0557 | ± | 0.0023 | 541.7 | ± | 7.0 | 543.6 | ± | 7.0 | 442 | ± | 91 | -22.56 |
| D5_028 | 0.49 | 128 | 99 | 0.79 | 2.26 | ± | 0.03 | 0.1624 | ± | 0.0034 | 2362.8 | ± | 22.5 | 2340.4 | ± | 22.3 | 2482 | ± | 35 | 4.80 |
| D5_029 | 0.30 | 961 | 93 | 0.10 | 8.68 | ± | 0.10 | 0.0702 | ± | 0.0009 | 702.7 | ± | 7.7 | 696.8 | ± | 7.6 | 934 | ± | 27 | 24.76 |
| D5_030 | 0.00 | 276 | 125 | 0.46 | 3.08 | ± | 0.03 | 0.1110 | ± | 0.0012 | 1812.2 | ± | 17.5 | 1811.7 | ± | 17.7 | 1818 | ± | 19 | 0.32 |
| D5_031 | 0.58 | 112 | 130 | 1.19 | 6.29 | ± | 0.08 | 0.0667 | ± | 0.0043 | 950.5 | ± | 11.6 | 955.0 | ± | 11.2 | 828 | ± | 129 | -14.80 |
| D5_032 | 0.05 | 211 | 48 | 0.23 | 3.13 | ± | 0.04 | 0.1142 | ± | 0.0015 | 1787.7 | ± | 17.5 | 1778.9 | ± | 17.5 | 1869 | ± | 23 | 4.35 |
| D5_033 | 0.00 | 124 | 131 | 1.08 | 2.75 | ± | 0.03 | 0.1260 | ± | 0.0015 | 2000.9 | ± | 16.9 | 1995.1 | ± | 17.1 | 2044 | ± | 21 | 2.11 |
| D5_034 | 0.58 | 16 | 10 | 0.60 | 3.07 | ± | 0.07 | 0.1032 | ± | 0.0067 | 1816.2 | ± | 35.0 | 1825.5 | ± | 34.4 | 1684 | ± | 116 | -7.85 |
| D5_035 | 0.00 | 441 | 89 | 0.21 | 3.44 | ± | 0.04 | 0.1148 | ± | 0.0010 | 1645.9 | ± | 17.1 | 1622.9 | ± | 17.0 | 1878 | ± | 16 | 12.36 |
| D5_036 | 0.00 | 706 | 1113 | 1.62 | 10.89 | ± | 0.16 | 0.0627 | ± | 0.0010 | 566.3 | ± | 7.9 | 563.9 | ± | 7.9 | 699 | ± | 33 | 18.98 |
| D5_037 | 0.03 | 1014 | 212 | 0.21 | 5.63 | ± | 0.07 | 0.0766 | ± | 0.0009 | 1054.8 | ± | 12.7 | 1052.4 | ± | 12.7 | 1111 | ± | 22 | 5.06 |
| D5_038 | 0.20 | 1495 | 68 | 0.05 | 8.26 | ± | 0.10 | 0.1154 | ± | 0.0010 | 736.3 | ± | 8.5 | 692.7 | ± | 8.1 | 1887 | ± | 16 | 60.98 |
| D5_039 | 0.00 | 360 | 334 | 0.95 | 9.31 | ± | 0.13 | 0.0633 | ± | 0.0012 | 657.8 | ± | 9.0 | 656.5 | ± | 9.0 | 720 | ± | 38 | 8.64 |
| D5_040 | 0.06 | 554 | 194 | 0.36 | 13.58 | ± | 0.17 | 0.0569 | ± | 0.0017 | 458.0 | ± | 5.5 | 457.6 | ± | 5.5 | 488 | ± | 66 | 6.15 |
| D5_041 | 0.00 | 630 | 202 | 0.33 | 10.82 | ± | 0.12 | 0.0600 | ± | 0.0010 | 569.7 | ± | 6.3 | 569.1 | ± | 6.3 | 605 | ± | 36 | 5.83 |
| D5_042 | 0.00 | 204 | 117 | 0.59 | 6.36 | ± | 0.08 | 0.0709 | ± | 0.0014 | 941.3 | ± | 11.5 | 940.8 | ± | 11.6 | 954 | ± | 41 | 1.34 |
| D5_043 | 0.00 | 517 | 216 | 0.43 | 3.51 | ± | 0.04 | 0.1367 | ± | 0.0014 | 1616.8 | ± | 15.5 | 1555.2 | ± | 15.2 | 2186 | ± | 18 | 26.04 |
| D5_044 | 0.00 | 164 | 94 | 0.59 | 2.63 | ± | 0.04 | 0.1483 | ± | 0.0017 | 2077.5 | ± | 27.5 | 2037.4 | ± | 27.3 | 2328 | ± | 19 | 10.76 |
| D5_045 | 0.00 | 287 | 99 | 0.35 | 3.06 | ± | 0.04 | 0.1127 | ± | 0.0011 | 1824.7 | ± | 21.8 | 1822.5 | ± | 21.8 | 1845 | ± | 18 | 1.10 |
| D5_046 | 0.00 | 467 | 98 | 0.21 | 3.24 | ± | 0.04 | 0.1227 | ± | 0.0014 | 1735.6 | ± | 18.5 | 1706.6 | ± | 18.4 | 1997 | ± | 20 | 13.09 |
| D5_047 | 0.00 | 511 | 248 | 0.50 | 6.52 | ± | 0.08 | 0.0710 | ± | 0.0010 | 919.9 | ± | 10.3 | 918.6 | ± | 10.3 | 959 | ± | 29 | 4.07 |
| D5_048 | 0.00 | 286 | 301 | 1.08 | 7.33 | ± | 0.08 | 0.0704 | ± | 0.0012 | 824.2 | ± | 8.5 | 820.6 | ± | 8.5 | 940 | ± | 34 | 12.32 |
| D5_049 | 0.00 | 196 | 86 | 0.45 | 3.05 | ± | 0.04 | 0.1138 | ± | 0.0017 | 1825.8 | ± | 23.3 | 1821.7 | ± | 23.4 | 1862 | ± | 27 | 1.95 |
| D5_050 | 0.45 | 546 | 109 | 0.20 | 2.89 | ± | 0.04 | 0.1235 | ± | 0.0018 | 1917.9 | ± | 20.5 | 1907.3 | ± | 20.5 | 2009 | ± | 26 | 4.54 |
| D5_051 | 0.00 | 141 | 78 | 0.57 | 12.53 | ± | 0.17 | 0.0598 | ± | 0.0021 | 495.0 | ± | 6.7 | 493.4 | ± | 6.7 | 596 | ± | 74 | 16.95 |
| D5_052 | 0.74 | 24 | 19 | 0.79 | 7.53 | ± | 0.18 | 0.0723 | ± | 0.0082 | 803.7 | ± | 17.9 | 798.0 | ± | 17.6 | 995 | ± | 216 | 19.23 |
| D5_053 | 0.00 | 273 | 363 | 1.36 | 168.58 | ± | 4.23 | 0.0536 | ± | 0.0057 | 38.1 | ± | 1.0 | 37.8 | ± | 1.0 | 355 | ± | 222 | 89.26 |
| D5_054 | 0.00 | 1278 | 612 | 0.49 | 4.61 | ± | 0.09 | 0.1103 | ± | 0.0009 | 1266.3 | ± | 21.3 | 1229.0 | ± | 20.7 | 1805 | ± | 15 | 29.85 |
| D5_055 | 0.00 | 829 | 5 | 0.01 | 5.84 | ± | 0.07 | 0.0759 | ± | 0.0008 | 1018.5 | ± | 11.4 | 1015.4 | ± | 11.4 | 1093 | ± | 22 | 6.82 |
| D5_056 | 0.21 | 158 | 87 | 0.57 | 3.49 | ± | 0.04 | 0.1065 | ± | 0.0023 | 1623.6 | ± | 17.2 | 1613.1 | ± | 17.2 | 1741 | ± | 40 | 6.74 |
| D5_057 | 0.00 | 363 | 378 | 1.07 | 2.69 | ± | 0.03 | 0.1237 | ± | 0.0013 | 2034.5 | ± | 20.7 | 2034.5 | ± | 20.7 | 2011 | ± | 19 | -1.17 |
| D5_058 | 0.00 | 188 | 87 | 0.48 | 3.28 | ± | 0.04 | 0.1035 | ± | 0.0012 | 1715.9 | ± | 16.4 | 1715.9 | ± | 16.4 | 1689 | ± | 21 | -1.59 |
| D5_059 | 0.11 | 1328 | 178 | 0.14 | 143.29 | ± | 1.79 | 0.0505 | ± | 0.0024 | 44.8 | ± | 0.6 | 44.6 | ± | 0.6 | 220 | ± | 105 | 79.62 |
| D5_060 | 0.00 | 383 | 194 | 0.52 | 3.64 | ± | 0.04 | 0.1108 | ± | 0.0010 | 1563.0 | ± | 15.1 | 1540.4 | ± | 15.0 | 1814 | ± | 17 | 13.84 |
| D5_061 | 0.26 | 232 | 92 | 0.41 | 7.04 | ± | 0.09 | 0.0682 | ± | 0.0019 | 856.1 | ± | 10.6 | 855.6 | ± | 10.6 | 875 | ± | 57 | 2.16 |
| D5_062 | 0.00 | 735 | 365 | 0.51 | 2.07 | ± | 0.03 | 0.1670 | ± | 0.0013 | 2541.9 | ± | 27.7 | 2541.9 | ± | 27.7 | 2529 | ± | 12 | -0.51 |
| D5_063 | 0.01 | 375 | 74 | 0.20 | 3.19 | ± | 0.03 | 0.1176 | ± | 0.0013 | 1759.3 | ± | 16.5 | 1741.7 | ± | 16.5 | 1921 | ± | 19 | 8.42 |
| D5_064 | 0.03 | 1469 | 426 | 0.30 | 12.88 | ± | 0.17 | 0.0571 | ± | 0.0010 | 482.1 | ± | 6.0 | 481.9 | ± | 6.1 | 495 | ± | 39 | 2.60 |
| D5_065 | 1.97 | 806 | 140 | 0.18 | 12.05 | ± | 0.18 | 0.1032 | ± | 0.0023 | 514.1 | ± | 7.5 | 486.5 | ± | 7.2 | 1684 | ± | 40 | 69.47 |
| D5_066 | 0.00 | 253 | 99 | 0.40 | 3.58 | ± | 0.05 | 0.0898 | ± | 0.0011 | 1586.5 | ± | 21.4 | 1586.5 | ± | 21.4 | 1422 | ± | 23 | -11.57 |
| D5_067 | 0.00 | 457 | 369 | 0.83 | 4.54 | ± | 0.06 | 0.1124 | ± | 0.0012 | 1283.9 | ± | 14.7 | 1244.3 | ± | 14.4 | 1840 | ± | 19 | 30.22 |
| D5_068 | 0.00 | 290 | 127 | 0.45 | 7.53 | ± | 0.10 | 0.0674 | ± | 0.0013 | 804.2 | ± | 9.7 | 802.9 | ± | 9.7 | 850 | ± | 39 | 5.38 |
| D5_069 | 1.25 | 978 | 405 | 0.43 | 11.81 | ± | 0.18 | 0.0992 | ± | 0.0018 | 523.8 | ± | 7.9 | 498.2 | ± | 7.5 | 1611 | ± | 34 | 67.49 |
| D5_070 | 0.17 | 382 | 130 | 0.35 | 3.10 | ± | 0.04 | 0.1129 | ± | 0.0015 | 1801.3 | ± | 21.4 | 1796.5 | ± | 21.4 | 1848 | ± | 24 | 2.53 |
| D5_071 | 0.00 | 620 | 323 | 0.53 | 7.54 | ± | 0.08 | 0.0661 | ± | 0.0010 | 802.7 | ± | 7.9 | 802.5 | ± | 7.9 | 811 | ± | 30 | 1.03 |
| D5_072 | 0.00 | 185 | 90 | 0.50 | 3.15 | ± | 0.04 | 0.1122 | ± | 0.0015 | 1776.9 | ± | 18.5 | 1770.6 | ± | 18.7 | 1836 | ± | 24 | 3.22 |
| D5_073 | 0.15 | 112 | 104 | 0.96 | 2.56 | ± | 0.04 | 0.1470 | ± | 0.0029 | 2125.0 | ± | 26.0 | 2094.7 | ± | 25.8 | 2312 | ± | 34 | 8.09 |
| D5_074 | 0.13 | 811 | 410 | 0.52 | 9.57 | ± | 0.12 | 0.0585 | ± | 0.0017 | 640.8 | ± | 7.9 | 641.6 | ± | 7.9 | 550 | ± | 64 | -16.51 |
| D5_075 | 0.25 | 1255 | 897 | 0.73 | 7.91 | ± | 0.10 | 0.0711 | ± | 0.0021 | 767.5 | ± | 9.1 | 762.0 | ± | 9.0 | 960 | ± | 60 | 20.05 |
| D5_076 | 0.00 | 425 | 345 | 0.83 | 6.99 | ± | 0.09 | 0.0719 | ± | 0.0011 | 861.8 | ± | 10.5 | 857.8 | ± | 10.5 | 983 | ± | 30 | 12.33 |
| D5_077 | 1.29 | 984 | 454 | 0.47 | 96.98 | ± | 1.40 | 0.0534 | ± | 0.0042 | 66.1 | ± | 1.0 | 65.6 | ± | 0.9 | 346 | ± | 167 | 80.89 |
| D5_078 | 0.00 | 174 | 104 | 0.61 | 4.38 | ± | 0.05 | 0.0835 | ± | 0.0013 | 1326.5 | ± | 14.4 | 1326.5 | ± | 14.4 | 1283 | ± | 30 | -3.39 |
| D5_079 | 0.00 | 412 | 225 | 0.56 | 2.98 | ± | 0.03 | 0.1131 | ± | 0.0011 | 1862.8 | ± | 16.4 | 1862.8 | ± | 16.4 | 1851 | ± | 17 | -0.64 |
| D5_080 | 0.00 | 61 | 94 | 1.59 | 7.50 | ± | 0.12 | 0.0638 | ± | 0.0028 | 807.0 | ± | 12.3 | 807.0 | ± | 12.3 | 737 | ± | 91 | -9.50 |
| D5_081 | 0.00 | 182 | 87 | 0.49 | 1.66 | ± | 0.02 | 0.2522 | ± | 0.0020 | 3045.6 | ± | 24.9 | 2981.9 | ± | 25.1 | 3200 | ± | 12 | 4.83 |
| D5_082 | 0.03 | 283 | 449 | 1.63 | 5.02 | ± | 0.05 | 0.0856 | ± | 0.0040 | 1171.2 | ± | 11.7 | 1162.8 | ± | 10.8 | 1331 | ± | 88 | 12.00 |
| D5_083 | 0.42 | 554 | 67 | 0.12 | 4.85 | ± | 0.05 | 0.1096 | ± | 0.0013 | 1207.7 | ± | 12.4 | 1169.9 | ± | 12.2 | 1793 | ± | 22 | 32.64 |
| D5_084 | 0.55 | 996 | 632 | 0.65 | 5.76 | ± | 0.12 | 0.1223 | ± | 0.0017 | 1032.6 | ± | 19.3 | 977.2 | ± | 18.4 | 1992 | ± | 25 | 48.16 |
| D5_085 | 0.16 | 546 | 54 | 0.10 | 3.88 | ± | 0.05 | 0.1118 | ± | 0.0013 | 1477.3 | ± | 17.7 | 1447.6 | ± | 17.5 | 1830 | ± | 21 | 19.27 |
| D5_086 | 0.13 | 195 | 34 | 0.18 | 2.07 | ± | 0.03 | 0.1848 | ± | 0.0019 | 2537.9 | ± | 30.9 | 2499.1 | ± | 30.8 | 2697 | ± | 17 | 5.90 |
| D5_087 | 0.02 | 239 | 159 | 0.68 | 2.09 | ± | 0.03 | 0.1660 | ± | 0.0021 | 2517.1 | ± | 26.0 | 2517.2 | ± | 26.2 | 2518 | ± | 22 | 0.03 |
| D5_088 | 0.06 | 561 | 172 | 0.32 | 3.17 | ± | 0.04 | 0.1124 | ± | 0.0013 | 1768.6 | ± | 19.7 | 1761.2 | ± | 19.7 | 1839 | ± | 22 | 3.83 |
| D5_089 | 0.00 | 275 | 115 | 0.43 | 2.47 | ± | 0.03 | 0.1337 | ± | 0.0013 | 2190.9 | ± | 22.9 | 2190.9 | ± | 22.9 | 2148 | ± | 17 | -2.00 |
| D5_090 | 0.00 | 374 | 187 | 0.51 | 12.50 | ± | 0.14 | 0.0593 | ± | 0.0013 | 496.1 | ± | 5.5 | 494.9 | ± | 5.5 | 577 | ± | 48 | 14.01 |
| D5_091 | 0.00 | 364 | 134 | 0.38 | 12.87 | ± | 0.18 | 0.0627 | ± | 0.0016 | 482.4 | ± | 6.3 | 479.0 | ± | 6.3 | 698 | ± | 55 | 30.88 |
| D5_092 | 0.02 | 571 | 47 | 0.08 | 12.43 | ± | 0.16 | 0.0557 | ± | 0.0012 | 498.8 | ± | 6.2 | 498.9 | ± | 6.2 | 440 | ± | 45 | -13.36 |
| D5_093 | 0.25 | 175 | 63 | 0.37 | 4.13 | ± | 0.06 | 0.0857 | ± | 0.0019 | 1398.3 | ± | 18.6 | 1401.5 | ± | 18.6 | 1333 | ± | 42 | -4.90 |
| D5_094 | 0.65 | 669 | 204 | 0.31 | 13.19 | ± | 0.17 | 0.0571 | ± | 0.0019 | 471.1 | ± | 5.8 | 470.8 | ± | 5.7 | 495 | ± | 73 | 4.84 |
| D5_095 | 0.00 | 661 | 510 | 0.79 | 7.61 | ± | 0.11 | 0.1554 | ± | 0.0016 | 795.6 | ± | 11.0 | 713.7 | ± | 10.1 | 2408 | ± | 18 | 66.96 |
| D5_096 | 0.13 | 422 | 207 | 0.50 | 3.25 | ± | 0.03 | 0.1145 | ± | 0.0016 | 1727.9 | ± | 16.2 | 1712.9 | ± | 16.2 | 1873 | ± | 25 | 7.75 |
| D5_097 | 1.71 | 91 | 34 | 0.38 | 6.49 | ± | 0.12 | 0.0834 | ± | 0.0054 | 923.4 | ± | 15.8 | 909.9 | ± | 16.0 | 1280 | ± | 121 | 27.86 |
| D5_098 | 0.00 | 340 | 210 | 0.63 | 3.27 | ± | 0.03 | 0.1156 | ± | 0.0012 | 1719.3 | ± | 15.7 | 1701.5 | ± | 15.6 | 1890 | ± | 18 | 9.03 |
| D5_099 | 1.64 | 38 | 50 | 1.35 | 6.75 | ± | 0.16 | 0.0658 | ± | 0.0083 | 890.4 | ± | 19.1 | 893.7 | ± | 18.3 | 801 | ± | 244 | -11.16 |
| D5_100 | 1.49 | 458 | 724 | 1.62 | 157.55 | ± | 4.49 | 0.0448 | ± | 0.0145 | 40.8 | ± | 1.2 | 40.9 | ± | 1.0 |  |  |  |  |
| D5_101 | 0.00 | 150 | 131 | 0.90 | 3.80 | ± | 0.04 | 0.0916 | ± | 0.0016 | 1506.8 | ± | 15.5 | 1506.8 | ± | 15.5 | 1460 | ± | 33 | -3.20 |
| D5_102 | 0.18 | 446 | 110 | 0.25 | 13.26 | ± | 0.15 | 0.0595 | ± | 0.0018 | 468.7 | ± | 5.0 | 467.0 | ± | 4.9 | 585 | ± | 65 | 19.87 |
| D5_103 | 0.86 | 89 | 92 | 1.06 | 6.06 | ± | 0.10 | 0.0690 | ± | 0.0060 | 985.2 | ± | 15.0 | 988.7 | ± | 14.3 | 901 | ± | 170 | -9.35 |
| D5_104 | 0.24 | 647 | 223 | 0.35 | 6.31 | ± | 0.10 | 0.0701 | ± | 0.0013 | 948.5 | ± | 14.0 | 949.2 | ± | 14.0 | 933 | ± | 37 | -1.67 |
| D5_105 | 0.06 | 495 | 71 | 0.15 | 5.63 | ± | 0.08 | 0.0746 | ± | 0.0012 | 1053.2 | ± | 13.3 | 1053.0 | ± | 13.4 | 1059 | ± | 33 | 0.55 |
| D5_106 | 0.18 | 543 | 383 | 0.72 | 5.57 | ± | 0.07 | 0.0737 | ± | 0.0017 | 1065.3 | ± | 11.8 | 1066.7 | ± | 11.8 | 1035 | ± | 45 | -2.93 |
| D5_107 | 0.00 | 226 | 145 | 0.66 | 3.03 | ± | 0.04 | 0.1133 | ± | 0.0016 | 1839.3 | ± | 21.4 | 1837.7 | ± | 21.6 | 1854 | ± | 26 | 0.79 |
| D5_108 | 0.00 | 270 | 190 | 0.72 | 110.90 | ± | 3.01 | 0.0524 | ± | 0.0039 | 57.9 | ± | 1.6 | 57.5 | ± | 1.6 | 306 | ± | 161 | 81.09 |
| D5_109 | 0.00 | 471 | 67 | 0.15 | 3.61 | ± | 0.04 | 0.1154 | ± | 0.0011 | 1575.3 | ± | 16.6 | 1546.2 | ± | 16.4 | 1886 | ± | 18 | 16.47 |
| D5_110 | 0.00 | 210 | 174 | 0.85 | 3.61 | ± | 0.05 | 0.0978 | ± | 0.0016 | 1574.9 | ± | 20.9 | 1574.2 | ± | 21.0 | 1584 | ± | 30 | 0.57 |
| D5_111 | 0.00 | 1241 | 249 | 0.21 | 3.62 | ± | 0.04 | 0.1136 | ± | 0.0010 | 1573.6 | ± | 16.6 | 1547.2 | ± | 16.4 | 1859 | ± | 15 | 15.35 |
| D5_112 | 1.54 | 1738 | 470 | 0.28 | 14.88 | ± | 0.16 | 0.0938 | ± | 0.0015 | 419.2 | ± | 4.5 | 399.8 | ± | 4.3 | 1505 | ± | 30 | 72.15 |
| D5_113 | 0.02 | 857 | 326 | 0.39 | 13.07 | ± | 0.16 | 0.0570 | ± | 0.0015 | 475.4 | ± | 5.6 | 475.2 | ± | 5.6 | 493 | ± | 57 | 3.56 |
| D5_114 | 0.02 | 409 | 49 | 0.12 | 3.23 | ± | 0.04 | 0.1148 | ± | 0.0012 | 1737.9 | ± | 20.3 | 1723.1 | ± | 20.2 | 1878 | ± | 20 | 7.46 |
| D5_115 | 0.38 | 332 | 154 | 0.48 | 12.83 | ± | 0.18 | 0.0531 | ± | 0.0028 | 483.9 | ± | 6.7 | 485.7 | ± | 6.6 | 334 | ± | 115 | -44.88 |
| D5_116 | 0.00 | 161 | 92 | 0.58 | 2.78 | ± | 0.04 | 0.1177 | ± | 0.0017 | 1978.0 | ± | 24.1 | 1978.0 | ± | 24.1 | 1923 | ± | 25 | -2.86 |
| D5_117 | 0.48 | 54 | 108 | 2.05 | 2.84 | ± | 0.05 | 0.1155 | ± | 0.0067 | 1942.6 | ± | 28.2 | 1950.5 | ± | 26.8 | 1889 | ± | 101 | -2.84 |
| D5_118 | 0.00 | 1181 | 320 | 0.28 | 3.19 | ± | 0.03 | 0.1133 | ± | 0.0009 | 1758.9 | ± | 15.0 | 1748.8 | ± | 15.0 | 1854 | ± | 15 | 5.13 |
| D5_119 | 0.00 | 86 | 60 | 0.72 | 6.46 | ± | 0.10 | 0.0681 | ± | 0.0022 | 928.2 | ± | 13.2 | 928.2 | ± | 13.2 | 874 | ± | 66 | -6.20 |
| D5_120 | 0.60 | 357 | 89 | 0.25 | 7.08 | ± | 0.10 | 0.0677 | ± | 0.0023 | 851.6 | ± | 10.8 | 851.5 | ± | 10.8 | 861 | ± | 68 | 1.10 |
| D5_121 | 0.55 | 209 | 163 | 0.80 | 5.22 | ± | 0.08 | 0.0715 | ± | 0.0034 | 1130.5 | ± | 15.4 | 1136.3 | ± | 15.1 | 973 | ± | 94 | -16.19 |
| D5_122 | 0.00 | 421 | 354 | 0.86 | 5.11 | ± | 0.06 | 0.0769 | ± | 0.0009 | 1153.2 | ± | 12.3 | 1153.2 | ± | 12.3 | 1119 | ± | 24 | -3.05 |
| D5_123 | 0.29 | 219 | 67 | 0.32 | 12.78 | ± | 0.17 | 0.0536 | ± | 0.0022 | 485.6 | ± | 6.3 | 487.0 | ± | 6.2 | 354 | ± | 89 | -37.18 |
| D5_124 | 0.74 | 722 | 185 | 0.26 | 7.76 | ± | 0.11 | 0.1146 | ± | 0.0016 | 781.8 | ± | 10.2 | 737.8 | ± | 9.7 | 1875 | ± | 24 | 58.30 |
| D5_125 | 0.34 | 160 | 128 | 0.82 | 6.41 | ± | 0.08 | 0.0647 | ± | 0.0028 | 934.5 | ± | 10.5 | 937.5 | ± | 10.3 | 766 | ± | 87 | -22.00 |
| D5_126 | 3.02 | 1481 | 1606 | 1.11 | 148.34 | ± | 3.54 | 0.0623 | ± | 0.0143 | 43.3 | ± | 1.0 | 42.5 | ± | 0.9 | 685 | ± | 427 | 93.68 |
| D5_127 | 0.20 | 308 | 96 | 0.32 | 2.68 | ± | 0.04 | 0.1244 | ± | 0.0024 | 2044.1 | ± | 27.2 | 2047.6 | ± | 27.0 | 2022 | ± | 34 | -1.09 |
| D5_128 | 0.05 | 186 | 76 | 0.42 | 3.09 | ± | 0.04 | 0.1135 | ± | 0.0020 | 1805.1 | ± | 17.9 | 1799.5 | ± | 17.9 | 1857 | ± | 32 | 2.79 |
| Errors are 1-sigma; Pbc and Pb* indicate the common and radiogenic portions, respectively. | | | | | | | | | | | |  |  |  |  |  |  |  |  |  |
| (1) Common Pb corrected by assuming 206Pb/238U-208Pb/232Th age-concordance | | | | | | | | | | |  |  |  |  |  |  |  |  |  |  |
| (2) Common Pb corrected by assuming 206Pb/238U-207Pb/235U age-concordance | | | | | | | | | | |  |  |  |  |  |  |  |  |  |  |
| (3) The degree of discordance for an analyzed spot indicates the chronological difference between the two ages determined by Pb–Pb and U–Pb methods, and is defined as {1-(238U/206Pb* age)/(207Pb*/206Pb* age)}×100 (%) (e.g., Song et al., 1996). | | | | | | | | | | | | | | | | | | | | |
